# Supplementary material for: Porous Zn-MOF with two diverse cages synthesized using functionalized biphenyl tricarboxylic acid: CO2 selective adsorption and fixation
Source: Royal Society of Chemistry journal article supplement (doi:10.1039/d3nj01937c), 2023-01-01
Supplement: d3nj01937c1.pdf [file d3nj01937c1.pdf]

## *Electronic Supplementary Information*

### **Porous Zn-MOF with two diverse cages synthesized using functionalized biphenyl tricarboxylic acid: CO<sub>2</sub> selective adsorption and fixation**

Nan An,<sup>a</sup> Lu-Lu Ma,<sup>a</sup> Fan Yang,<sup>a</sup> Wen-Yan Zhang,<sup>a</sup> Guo-Ping Yang,<sup>\*a</sup> and Yao-Yu Wang<sup>\*a</sup>

<sup>a</sup>*Key Laboratory of Synthetic and Natural Functional Molecule of the Ministry of Education, Shaanxi Key Laboratory of Physico-Inorganic Chemistry, Xi'an Key Laboratory of Functional Supramolecular Structure and Materials, College of Chemistry & Materials Science, Northwest University, Xi'an 710127, Shaanxi, P. R. China.*

\*E-mail: [ygp@nwu.edu.cn](mailto:ygp@nwu.edu.cn); [wyaoyu@nwu.edu.cn](mailto:wyaoyu@nwu.edu.cn)

## Materials and general methods.

The powder X-ray diffraction (PXRD) data were tested on Bruker D8 ADVANCE X-ray powder diffractometer. Thermogravimetric analyses (TGA) were performed on the NETZSCH STA 449C microanalyzer thermal analyzer under a N<sub>2</sub> atmosphere. The infrared spectra (IR) data were tested in the range of 400-4000 cm<sup>-1</sup> on Bruker Equinox-55 FT-IR spectrometer. Gas sorption isotherms were performed on an ASAP 2020 M sorption equipment using 30mg of MOFs. <sup>1</sup>H NMR spectrograms were gained on a Bruker Ascend 400 (400 MHz) spectrometer.

**Table S1.** Selected bond lengths (Å) and bond angles (°) for **1**.

| Complex 1      |           |                        |           |
|----------------|-----------|------------------------|-----------|
| Zn(1)-Zn(1)#1  | 2.778(4)  | O(2)#6-Zn(2)-O(7)#7    | 102.4(6)  |
| Zn(1)-O(1)     | 1.982(9)  | O(3)-Zn(2)-Zn(2)#5     | 122.4(5)  |
| Zn(1)-O(1)#2   | 1.982(9)  | O(3)-Zn(2)-Zn(2)#4     | 122.6(4)  |
| Zn(1)-O(4)#1   | 1.992(9)  | O(3)-Zn(2)-O(5)        | 107.5(7)  |
| Zn(1)-O(4)#3   | 1.992(9)  | O(3)-Zn(2)-O(7)#7      | 116.8(7)  |
| Zn(1)-O(6)     | 2.083(12) | O(5)-Zn(2)-Zn(2)#4     | 36.0(2)   |
| Zn(2)-Zn(2)#4  | 3.132(3)  | O(5)-Zn(2)-Zn(2)#5     | 36.0(2)   |
| Zn(2)-Zn(2)#5  | 3.132(4)  | O(7)#7-Zn(2)-Zn(2)#5   | 118.3(5)  |
| Zn(2)-O(2)#6   | 1.903(11) | O(7)#7-Zn(2)-Zn(2)#4   | 75.1(4)   |
| Zn(2)-O(3)     | 1.921(13) | O(7)#7-Zn(2)-O5        | 110.8(5)  |
| Zn(2)-O(5)     | 1.935(6)  | O(3A)#5-Zn(2A)-O(5)    | 97(3)     |
| Zn(2)-O(7)#7   | 1.931(13) | O(3A)#5-Zn(2A)-O(7A)#8 | 140(4)    |
| Zn(2A)-O(3A)#5 | 1.98(9)   | O(5)-Zn(2A)-O(7A)#8    | 95(3)     |
| Zn(2A)-O(5)    | 2.00(3)   | O(8)-Zn(3)-O(5)        | 112.1(4)  |
| Zn(2A)-O(7A)#8 | 2.37(10)  | O(8)#5-Zn(3)-O(5)      | 112.1(4)  |
| Zn(3)-O(5)     | 1.957(17) | O(8)#4-Zn(3)-O(5)      | 112.1(4)  |
| Zn(3)-O(8)4#   | 1.940(10) | O(8)#4-Zn(3)-O(8)      | 106.7(5)  |
| Zn(3)-O(8)5#   | 1.940(10) | O(8)#4-Zn(3)-O(8)5     | 106.7(4)  |
| Zn(3)-O(8)     | 1.940(10) | O(8)#5-Zn(3)-O(8)      | 106.7(5)  |
| Zn(3A)-O(2A)#6 | 2.01(10)  | O(2A)#8-Zn(3A)-O(2A)#7 | 116.5(19) |
| Zn(3A)-O(2A)#8 | 2.01(10)  | O(2A)#6-Zn(3A)-O(2A)#8 | 116.5(19) |
| Zn(3A)-O(2A)#7 | 2.01(10)  | O(2A)#6-Zn(3A)-O(2A)#7 | 116.5(19) |
| Zn(3A)-O(5)    | 1.94(4)   | O(5)-Zn(3A)-O(2A)#8    | 101(3)    |
| O(1)-C(4)      | 1.221(18) | O(5)-Zn(3A)-O(2A)#7    | 101(3)    |
| O(2)-C(10)     | 1.256(19) | O(5)-Zn(3A)-O(2A)#6    | 101(3)    |
| O(2A)-C(10)    | 1.46(11)  | C(4)-O(1)-Zn(1)        | 122.1(8)  |
| O(3)-C(14)     | 1.20(2)   | C(10)-O(2)-Zn(2)#9     | 127.2(10) |
| O(3A)-C(14A)   | 1.21(3)   | C(10)-O(2A)-Zn(3A)#10  | 107(5)    |
| O(4)-C(4)      | 1.219(17) | C(14)-O(3)-Zn(2)       | 135.5(13) |

|                      |           |                       |          |
|----------------------|-----------|-----------------------|----------|
| O(7)-C(10)           | 1.253(18) | C(4)-O(4)-Zn(1)#2     | 125.7(9) |
| O(7A)-C(10)          | 1.61(10)  | Zn(2)-O(5)-Zn(2)#5    | 108.1(5) |
| O(8)-C(14)           | 1.28(2)   | Zn(2)#4-O(5)-Zn(2)#5  | 108.1(5) |
| O(8A)-C(14A)         | 1.20(3)   | Zn(2)-O(5)-Zn(2)#4    | 108.1(5) |
| O(1)#1-Zn(1)-Zn(1)#2 | 83.2(3)   | Zn(2)-O(5)-Zn(2A)#5   | 69.5(9)  |
| O(1)-Zn(1)-Zn(1)#2   | 83.2(3)   | Zn(2)#5-O(5)-Zn(2A)#5 | 177.4(9) |
| O(1)#1-Zn(1)-O(1)    | 166.5(6)  | Zn(2)#4-O(5)-Zn(2A)#5 | 73.8(10) |
| O(1)-Zn(1)-O(4)#3    | 89.0(4)   | Zn(2)#4-O(5)-Zn(2A)#4 | 177.4(9) |
| O(1)#1-Zn(1)-O(4)#2  | 89.0(4)   | Zn(2)-O(5)-Zn(2A)#4   | 73.8(10) |

Symmetry transformations used to generate equivalent atoms: #1 +x, 1-y, -z; #2 1-x, 1-y, +z; #3 1-x, +y, -z; #4 1-x, +y, 1-z; #5 +x, 1-y, 1-z; #6 1/2-x, 3/2-y, 1/2+z; #7 1/2+x, -1/2+y, 1/2+z; #8 1/2+x, 3/2-y, 1/2-z; #9 3/2-x, -1/2+y, 1/2-z; #10 -1/2+x, 3/2-y, 1/2-z; #11 -1/2+x, -1/2+y, 1/2+z.

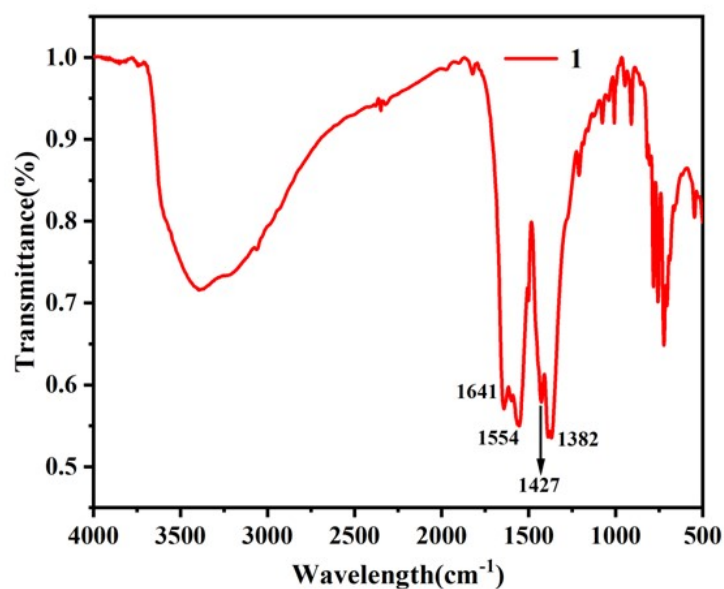

**Fig. S1** The FT-IR spectra of **1** (1641=carbon carbon double bond, 1554=benzene ring, 1427, 1382=hydrocarbon bond).

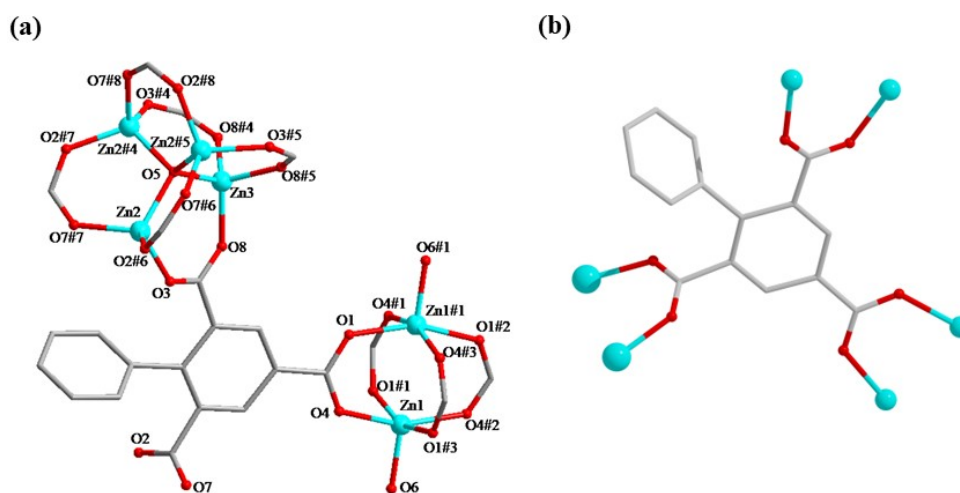

**Fig. S2** (a) Coordination environment diagram of **1**. (b) The coordination modes of  $L^{3-}$  in **1**.

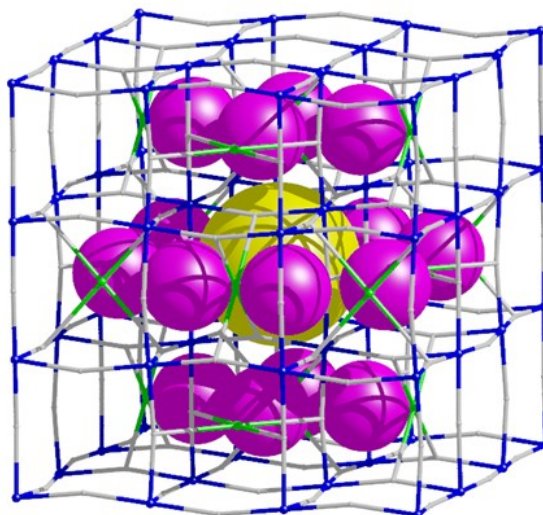

Fig. S3 The topological net for 1.

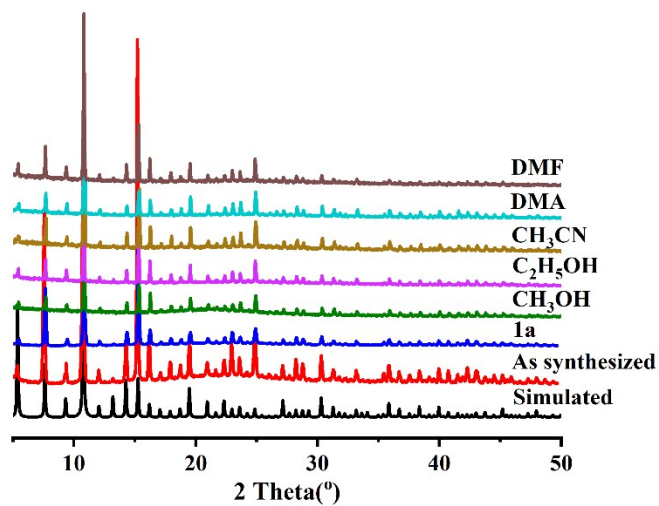

Fig. S4 PXRD patterns of 1, 1a and 1 at different common solvents (.

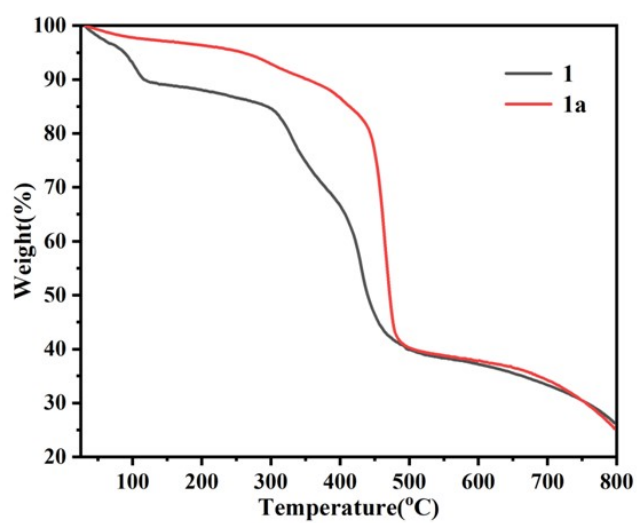

Fig. S5 The TGA plots of 1 and 1a under N<sub>2</sub> environment.

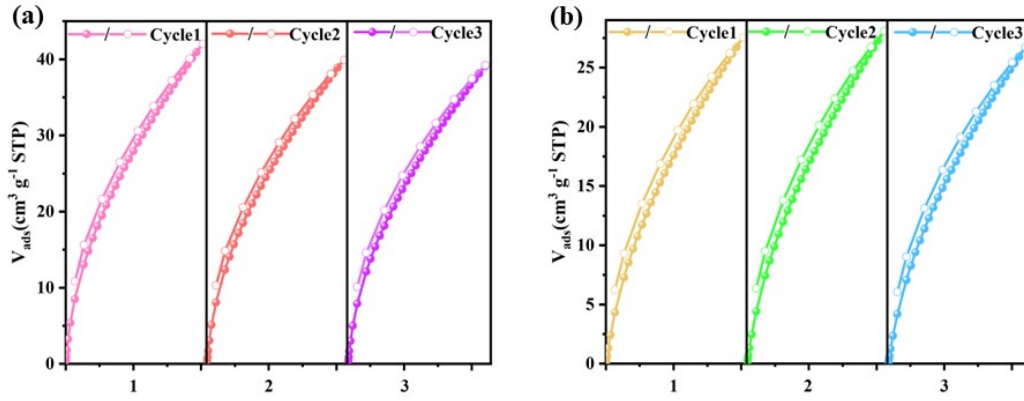

**Fig. S6** CO<sub>2</sub> reabsorption experiments at different temperatures: 273 K (a) and 298 K (b)

### Calculation of sorption heat for gas using Virial 2 model

$$\ln P = \ln N + 1/T \sum_{i=0}^m a_i N^i + \sum_{i=0}^n b_i N^i$$

$$Q_{st} = -R \sum_{i=0}^m a_i N^i$$

Above virial expression was used to fit the combined isotherm data for 1a at 273.15 and 298 K, where  $P$  is the pressure,  $N$  is the adsorbed amount,  $T$  is the temperature,  $a_i$  and  $b_i$  are virial coefficients, and  $m$  and  $n$  are the number of coefficients used to describe the isotherms.  $Q_{st}$  is the coverage-dependent enthalpy of adsorption and  $R$  is the universal gas constant.

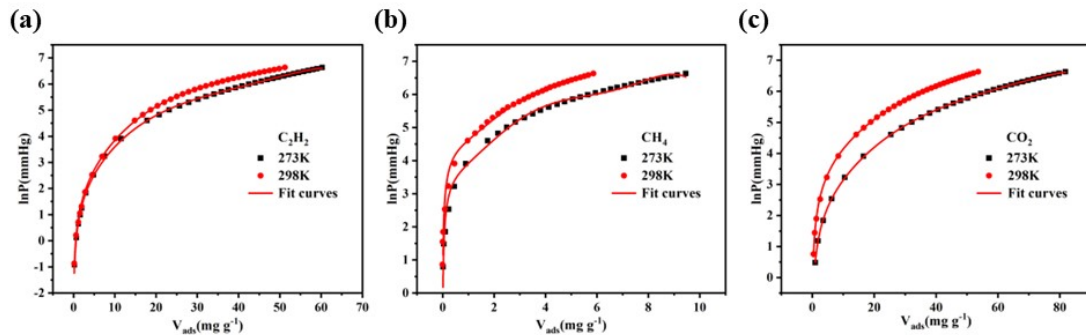

**Fig. S7** (a) C<sub>2</sub>H<sub>2</sub>,  $a_0 = -397.0335$ ,  $a_1 = 40.95674$ ,  $a_2 = -47.48092$ ,  $a_3 = -0.02085$ ,  $a_5 = -4.10052E-6$ ,  $b_0 = 1.92079$ ,  $b_1 = 0.26785$ ,  $b_2 = -0.00366$ ,  $\chi^2 = 0.00443$ ,  $R^2 = 0.99911$ . (b) CH<sub>4</sub>,  $a_0 = -2470.79298$ ,  $a_1 = 36.70724$ ,  $a_2 = 187.05099$ ,  $a_3 = -58.89557$ ,  $a_4 = 6.24143$ ,  $b_0 = 13.72709$ ,  $b_1 = -1.59287$ ,  $b_2 = 0.20751$ ,  $\chi^2 = 0.08251$ ,  $R^2 = 0.97016$ . (c) CO<sub>2</sub>,  $a_0 = -3667.28881$ ,  $a_1 = 41.78032$ ,  $a_2 = -0.03396$ ,  $a_3 = -0.01236$ ,  $a_4 = 1.61371E-4$ ,  $a_5 = -7.29678E-7$ ,  $b_0 = 13.94246$ ,  $b_1 = -0.12791$ ,  $b_2 = 0.00128$ ,  $\chi^2 = 3.84946E-4$ ,  $R^2 = 0.99987$ .

### Selectivity prediction via IAST

The experimental isotherm data for pure gas A, and gas B were fitted at 298 K using a dual Langmuir-Freundlich (L-F) model (Figure S7):

$$q = \frac{a_1 * b_1 * p^{c_1}}{1 + b_1 * p^{c_1}} + \frac{a_2 * b_2 * p^{c_2}}{1 + b_2 * p^{c_2}}$$

Where  $q$  and  $p$  are adsorbed amounts and the pressure of component  $i$ , respectively.

The adsorption selectivities for binary mixtures of gas A/gas B, defined by

$$S_{i/j} = \frac{x_i * y_j}{x_j * y_i}$$

were respectively calculated using the Ideal Adsorption Solution Theory (IAST) of Myers and Prausnitz. Where  $x_i$  is the mole fraction of component  $i$  in the adsorbed phase and  $y_i$  is the mole fraction of component  $i$  in the bulk.

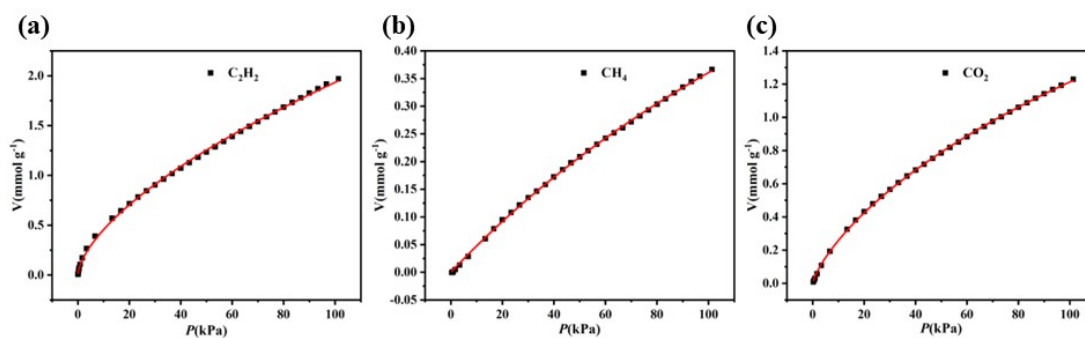

**Fig. S8** (a)  $C_2H_2$ ,  $a_1 = 193.65101$ ,  $b_1 = 5.52032E-4$ ,  $c_1 = 0.63093$ ,  $\chi^2 = 2.88567E-4$ ,  $R^2 = 0.99929$ ; (b)  $CH_4$ ,  $a_1 = 1.38534$ ,  $b_1 = 0.0036$ ,  $c_1 = 0.99494$ ,  $\chi^2 = 4.61392E-6$ ,  $R^2 = 0.99967$ ; (c)  $CO_2$ ,  $a_1 = 5.21952$ ,  $b_1 = 0.00897$ ,  $c_1 = 0.76415$ ,  $\chi^2 = 3.44731E-5$ ,  $R^2 = 0.99976$ .

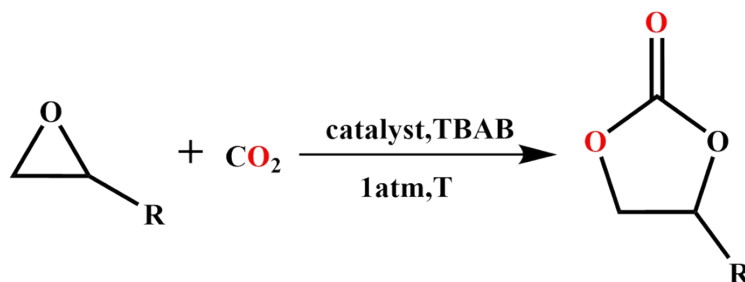

**Scheme S1**  $CO_2$  cycloaddition equation.

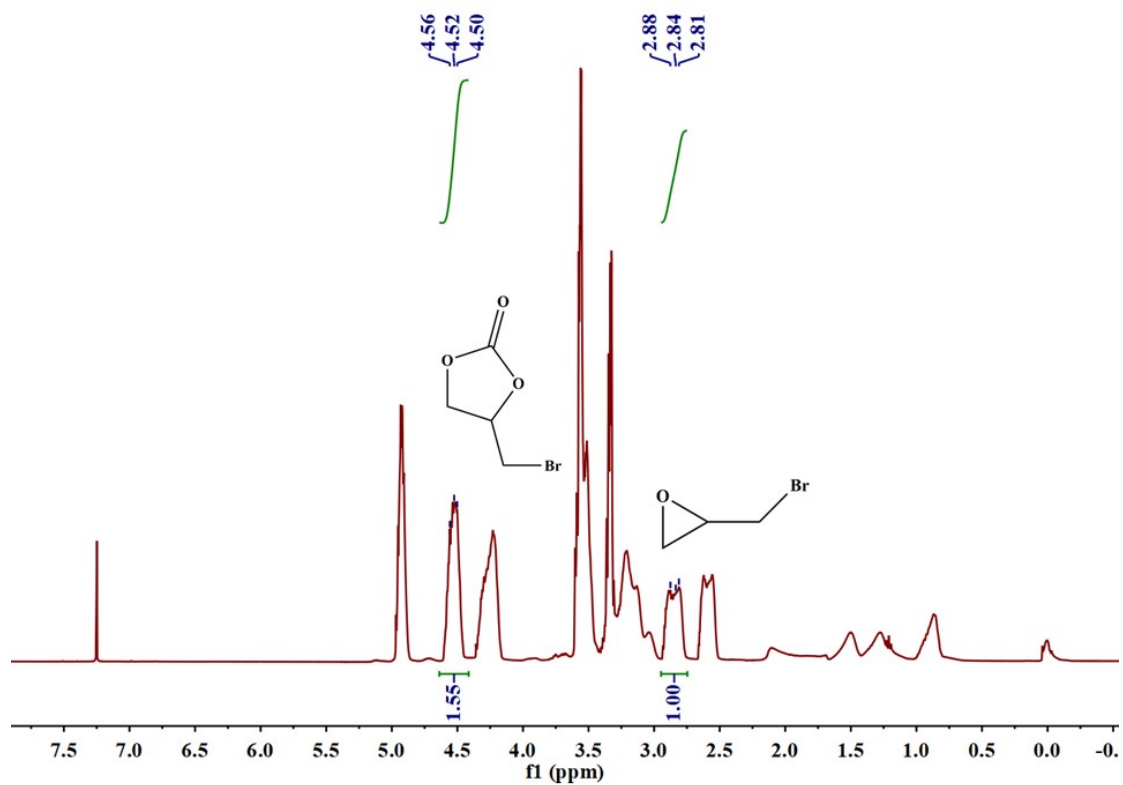

Fig. S9  $^1\text{H}$  NMR spectrum of 4-bromomethyl -1,3-dioxolan-2-one in  $\text{CDCl}_3$ . (Table 2, entry 1).

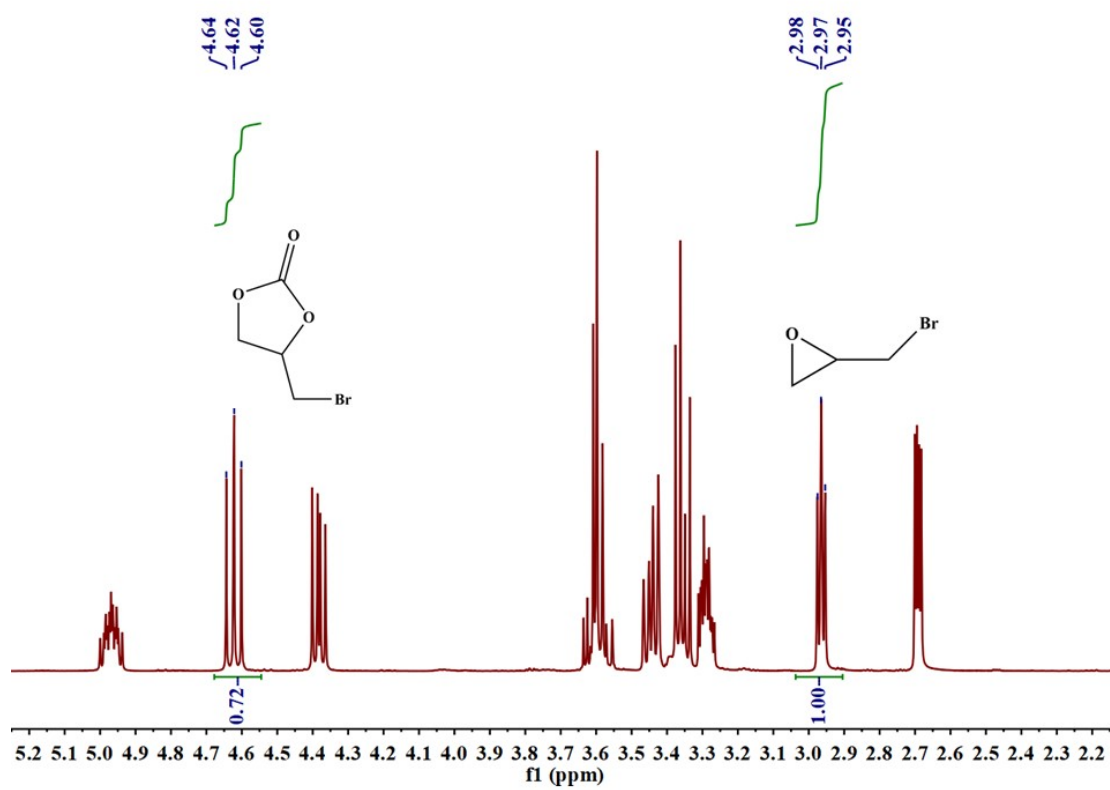

Fig. S10  $^1\text{H}$  NMR spectrum of 4-bromomethyl -1,3-dioxolan-2-one in  $\text{CDCl}_3$ . (Table 2, entry 2).

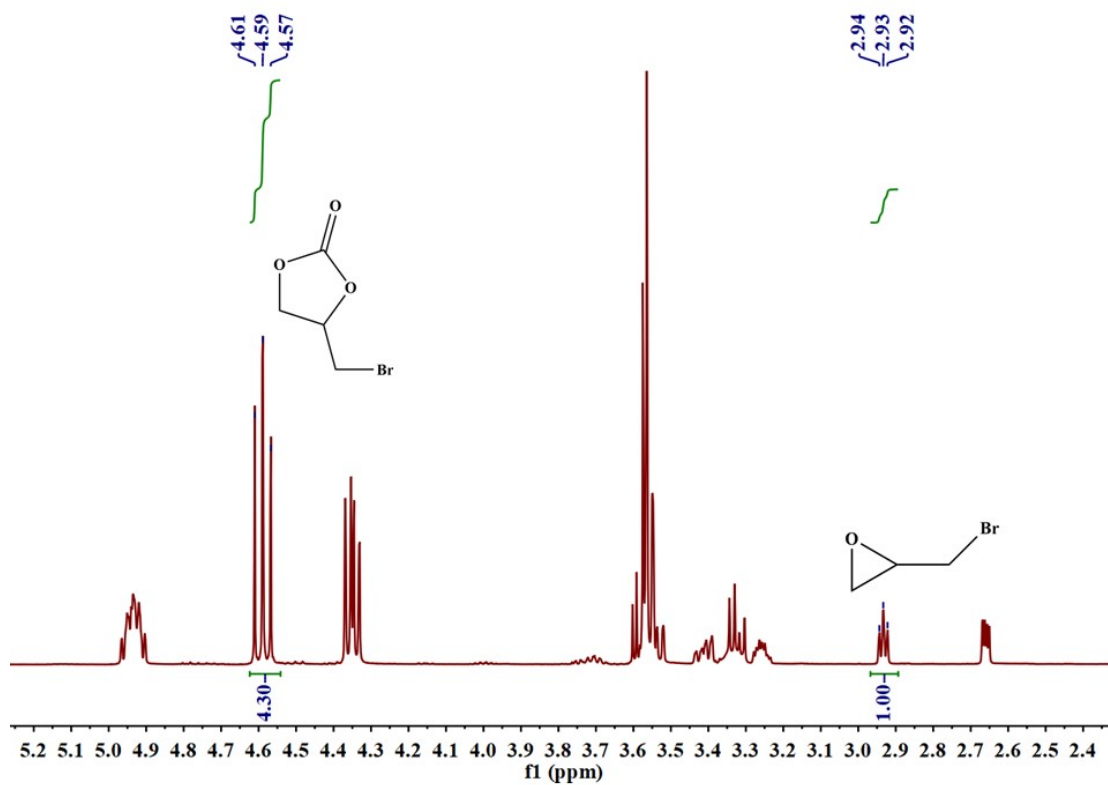

Fig. S11  $^1\text{H}$  NMR spectrum of 4-bromomethyl -1,3-dioxolan-2-one in  $\text{CDCl}_3$ . (Table 2, entry 3).

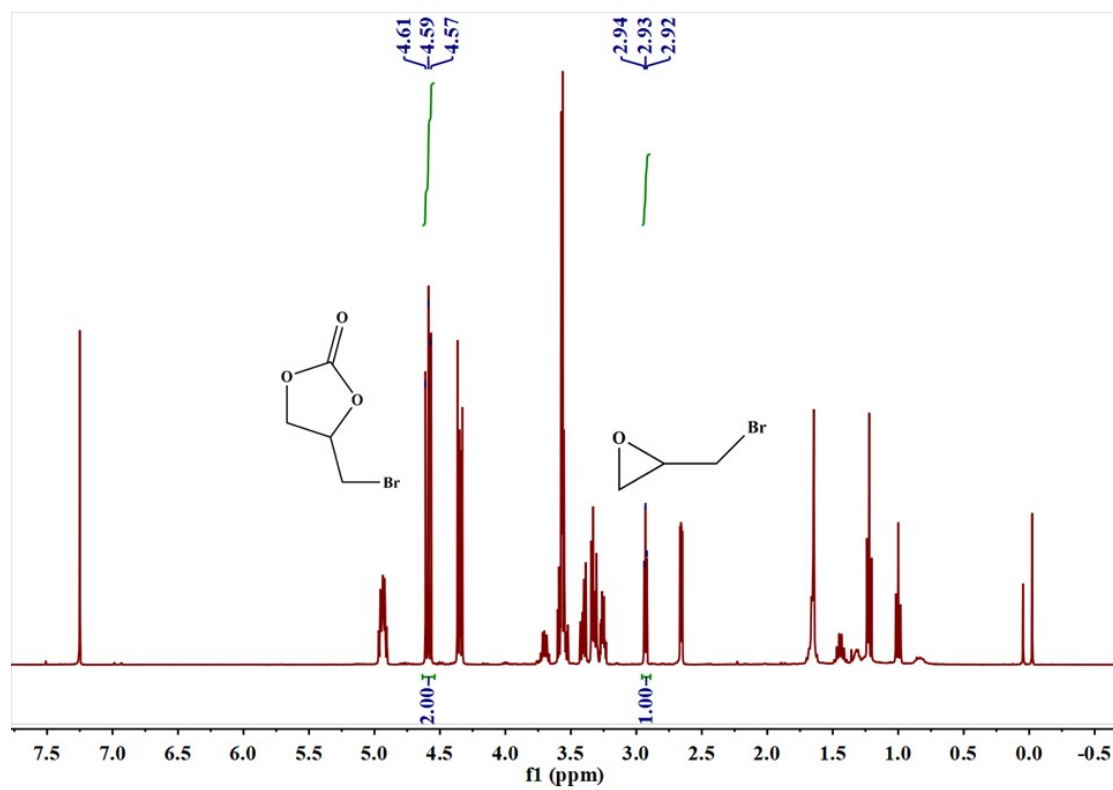

Fig. S12  $^1\text{H}$  NMR spectrum of 4-bromomethyl -1,3-dioxolan-2-one in  $\text{CDCl}_3$ . (Table 2, entry 4).



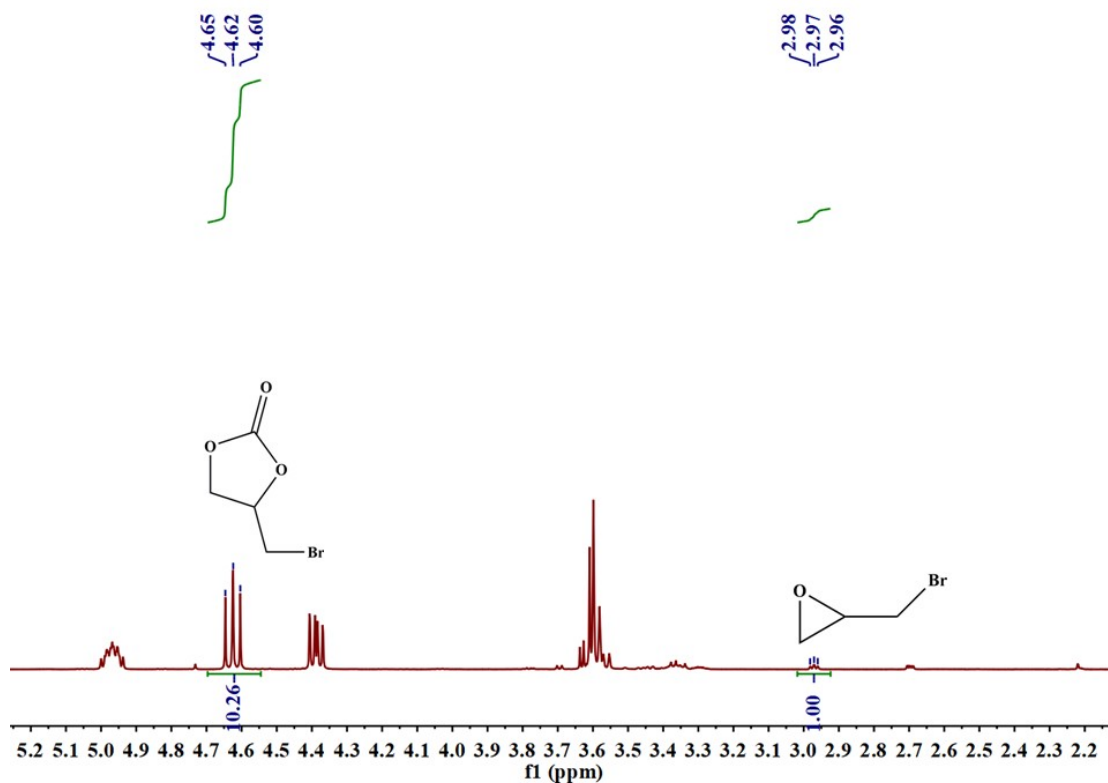

Fig. S13  $^1\text{H}$  NMR spectrum of 4-bromomethyl -1,3-dioxolan-2-one in  $\text{CDCl}_3$ . (Table 2, entry 5).

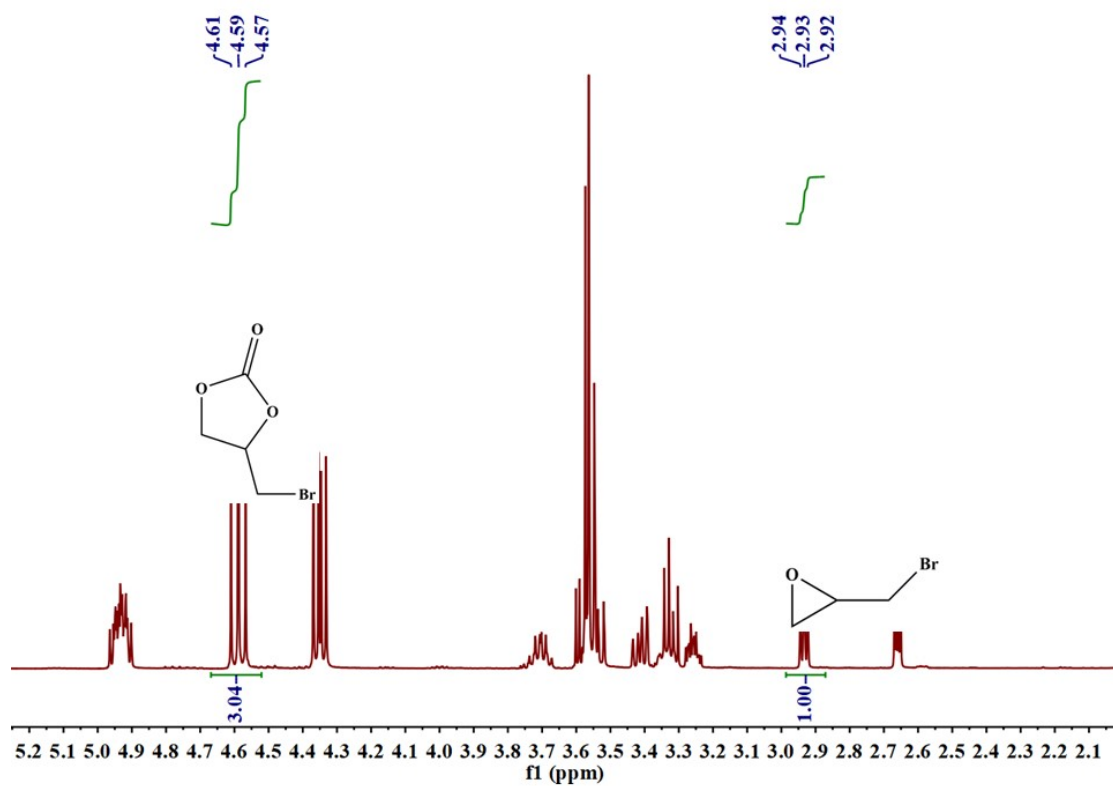

Fig. S14  $^1\text{H}$  NMR spectrum of 4-bromomethyl -1,3-dioxolan-2-one in  $\text{CDCl}_3$ . (Table 2, entry 6).

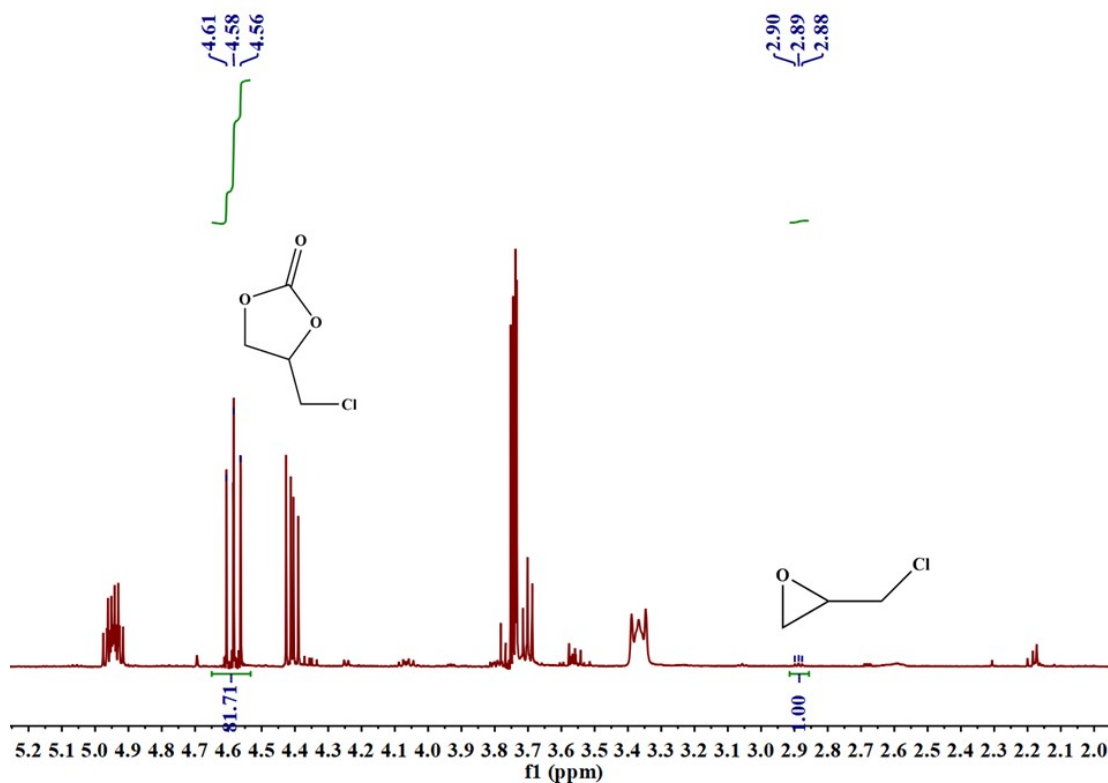

**Fig. S15**  $^1\text{H}$  NMR spectrum of 4-chloromethyl-1,3-dioxolan-2-one in  $\text{CDCl}_3$ . (Table 2, entry 7).

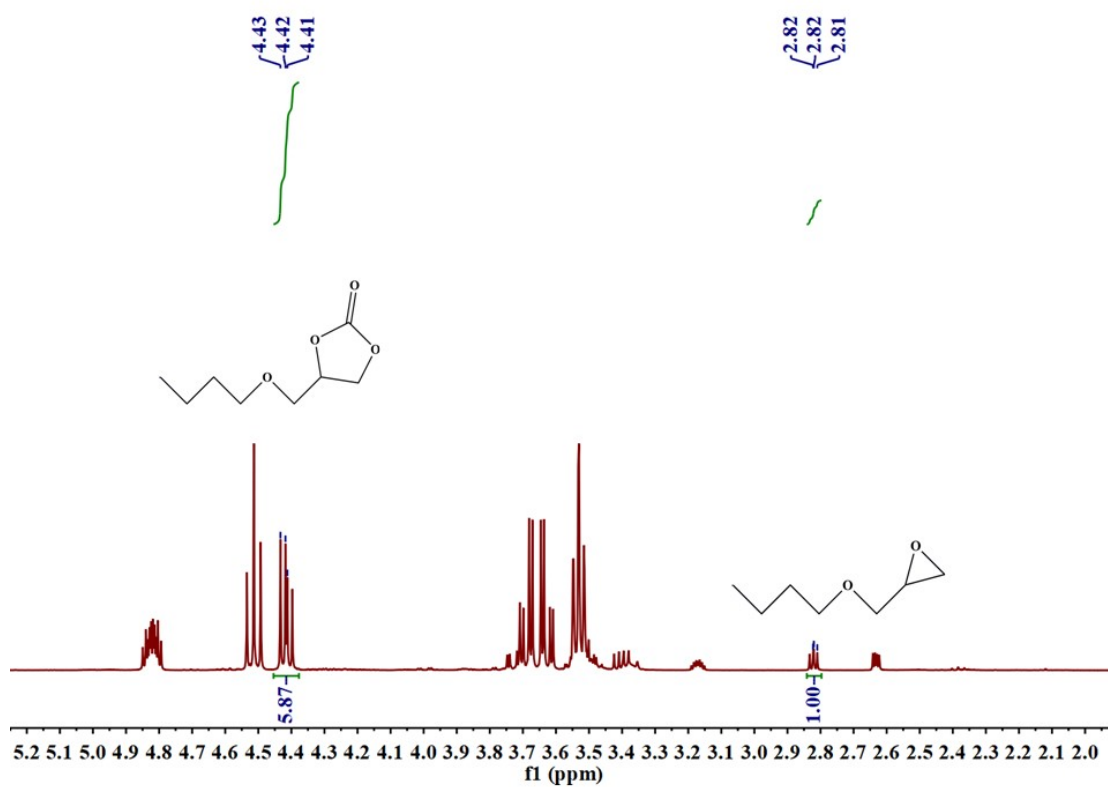

**Fig. S16**  $^1\text{H}$  NMR spectrum of 3-butoxy-1,2-propylene carbonate in  $\text{CDCl}_3$ . (Table 2, entry 8).

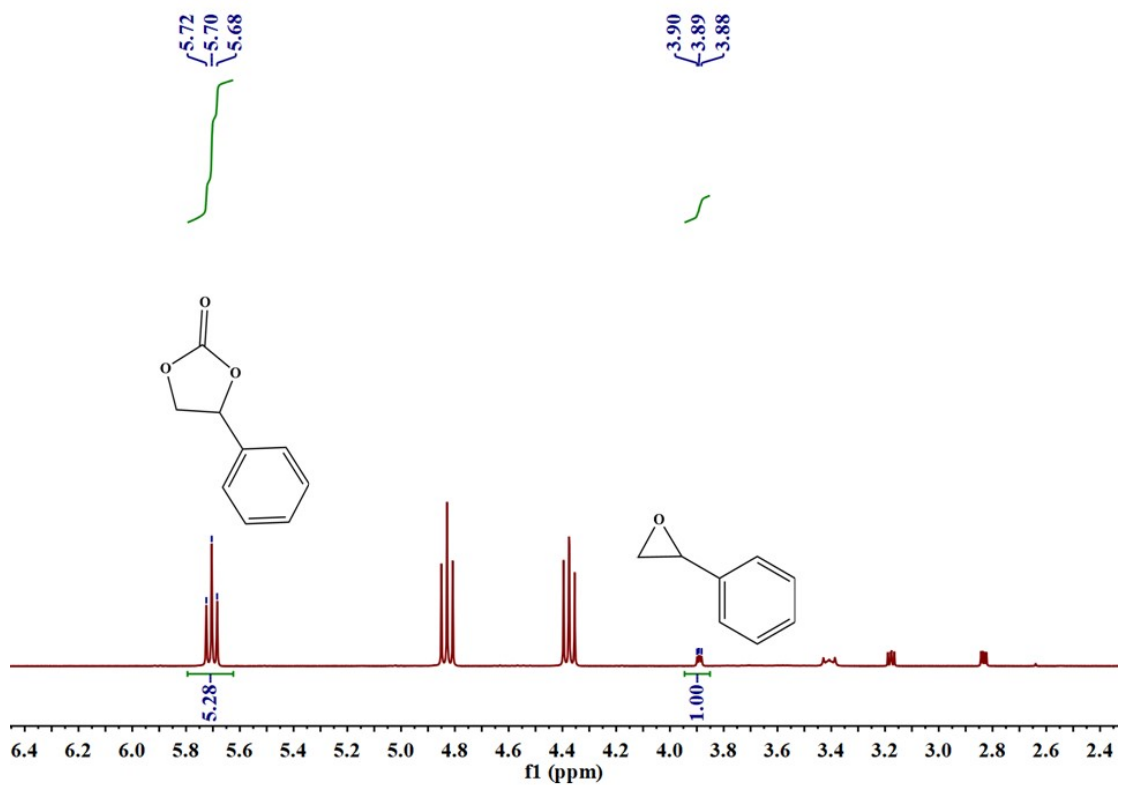

Fig. S17  $^1\text{H}$  NMR spectrum of styrene carbonate in  $\text{CDCl}_3$ . (Table 2, entry 9).

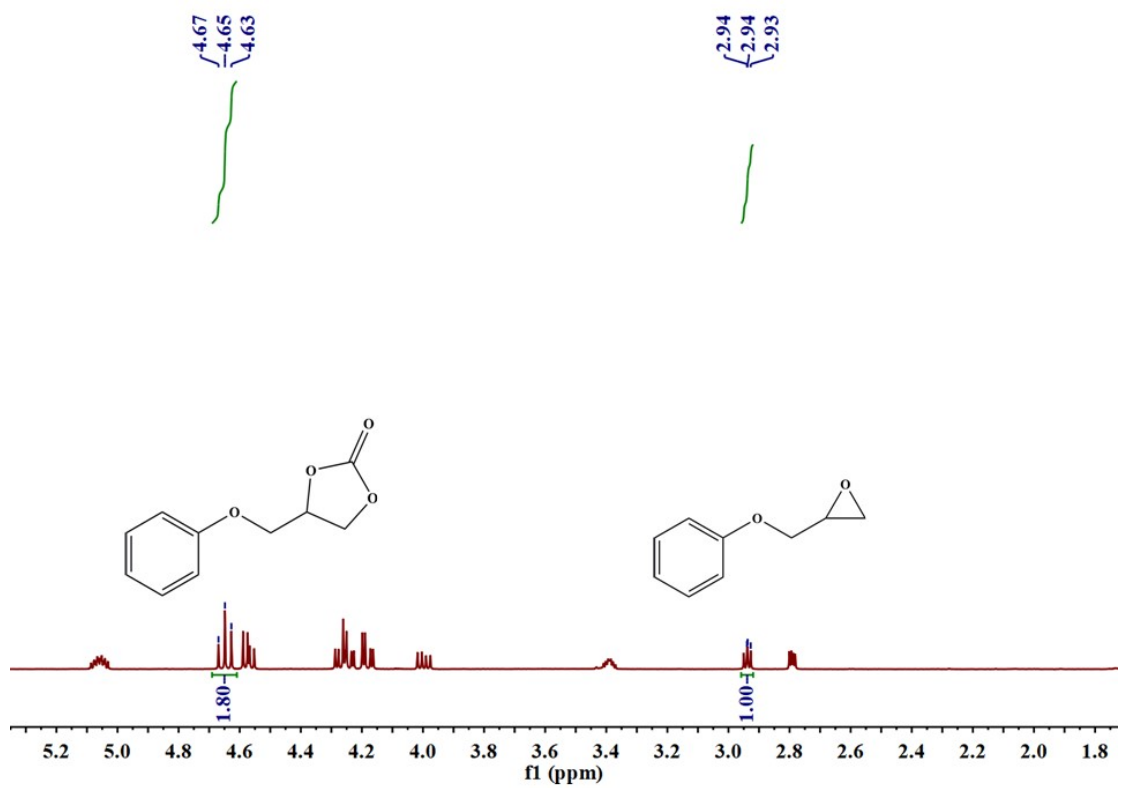

Fig. S18  $^1\text{H}$  NMR spectrum of 4-(phenoxyethyl)-1,3-dioxolan-2-one in  $\text{CDCl}_3$ . (Table 2, entry 10).

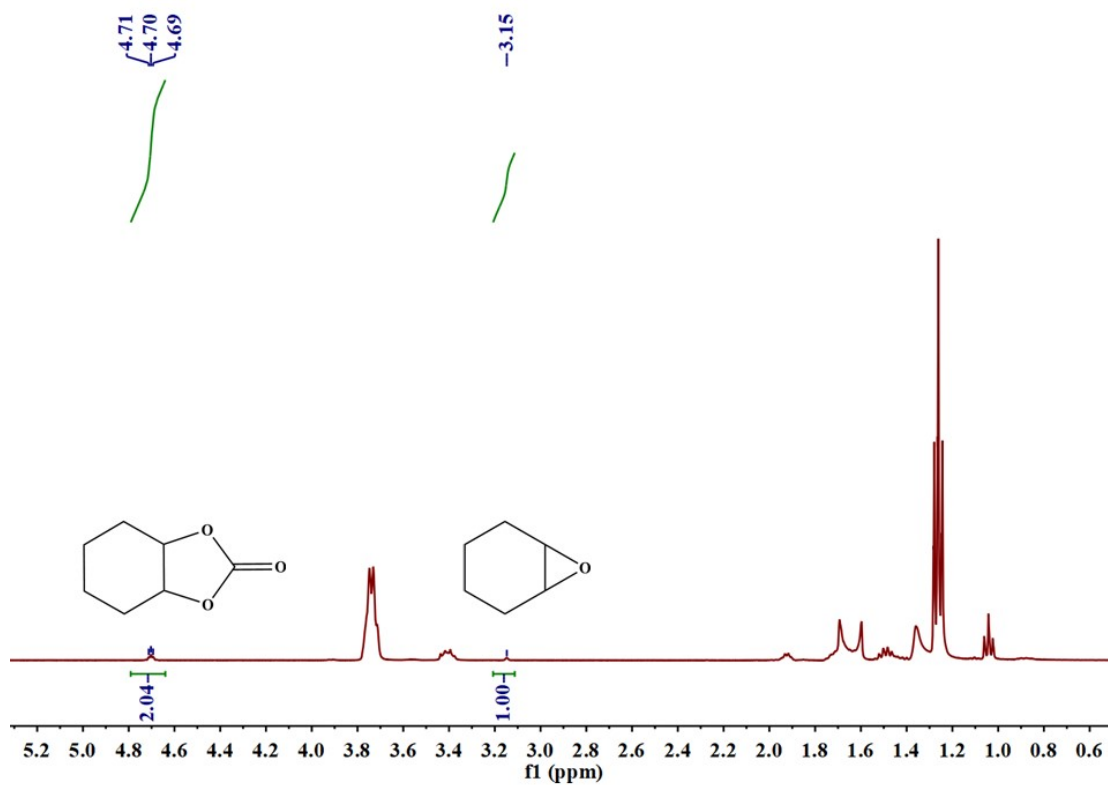

**Fig. S19** <sup>1</sup>H NMR spectrum of benzo[1,3]dioxol-2-one with **1**. (The solvent is CDCl<sub>3</sub>).
